# Supplementary material for: Novel aggregation-induced emission and thermally activated delayed fluorescence materials based on thianthrene-9,9′,10,10′-tetraoxide derivatives
Source: Royal Society of Chemistry journal article supplement (doi:10.1039/c6ra03281h), 2016-01-01
Supplement: c6ra03281h1.pdf [file c6ra03281h1.pdf]

## Novel aggregation-induced emission and thermally activated delayed fluorescence materials based on thianthrene-9,9',10,10'-tetraoxide derivatives

Kaiyong Sun, Wei Jiang,\* Xinxin Ban, Bin Huang, Zhaohang Zhang, Muyang Ye and Yueming Sun\*

**Table S1** The emission data of curves fits at 300 K.

|          | Exponentials | T1(sec)  | T2(sec)  | Average Life Time | CHISQ    |
|----------|--------------|----------|----------|-------------------|----------|
| tCzDSO2  | 1            | 1.64E-08 | /        | 1.64E-08          | 1.096133 |
| 3tCzDSO2 | 2            | 2.92E-08 | 1.58E-06 | 6.63E-07          | 1.089095 |

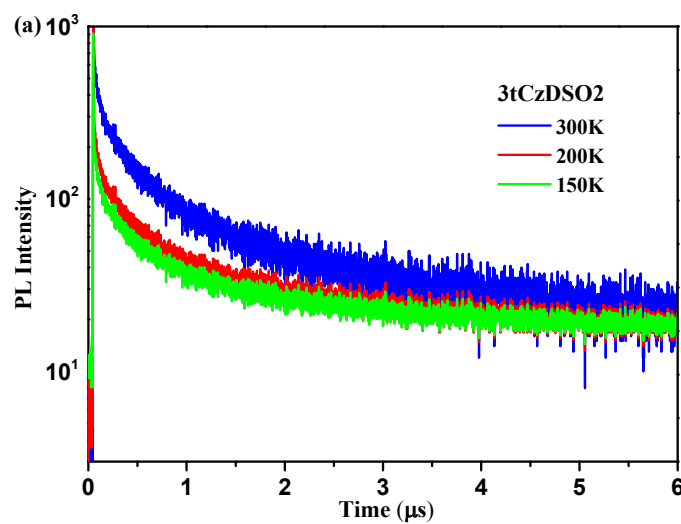

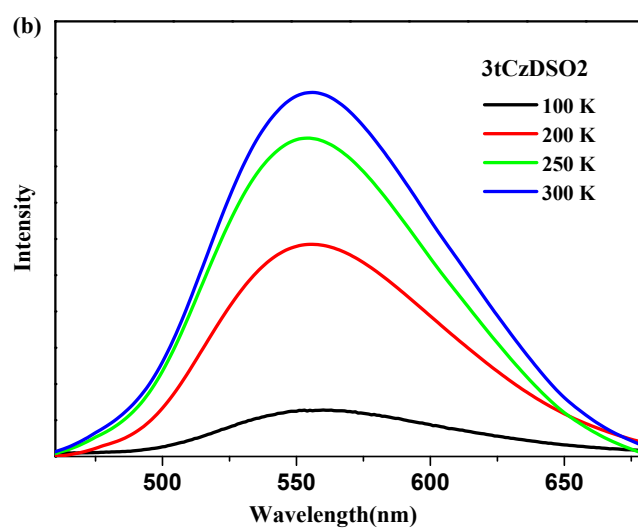

**Fig. S1 (a)** Temperature-dependence of the transient PL spectra for 3tCzDSO2 in solid film. **(b)** Temperature-dependence of the delayed fluorescence emission for 3tCzDSO2 in solid film with 20  $\mu$ s delay.
